# Supplementary material
Source: MDPI journal article supplement (https://www.mdpi.com/2071-1050/14/10/6205)
Supplement: s1 [file s1]

Table S1. Case Study Tool Inputs of Project Participant in Design Phase.

| Are you Committed to the following Decision |     | If Select No Justify Your Selection | Commitment Indicator For Energy Consumption Reduction                                        |     | Identify the renewable energy technologies available in the market         | Select suitable renewable technologies | Integrated the selected renewable technologies with project design                 | Use dynamic simulation to check project systems synergy | Commitment Outcome for Energy Consumption Reduction |
|---------------------------------------------|-----|-------------------------------------|----------------------------------------------------------------------------------------------|-----|----------------------------------------------------------------------------|----------------------------------------|------------------------------------------------------------------------------------|---------------------------------------------------------|-----------------------------------------------------|
| Energy Consumption Reduction                | Yes |                                     | Incorporation level of renewable energy sources into the project design                      | Yes | Y                                                                          | Y                                      | N                                                                                  | N                                                       | Medium Energy Reduction Commitment 50%              |
|                                             |     |                                     |                                                                                              |     |                                                                            |                                        |                                                                                    |                                                         |                                                     |
|                                             |     |                                     | Involving green experts with energy reduction experience in the design team                  | NA  | N                                                                          | N                                      | N                                                                                  | N                                                       |                                                     |
| Energy Consumption Reduction                |     |                                     |                                                                                              |     | Identify the design elements                                               | Collect necessary information          | Integrate and analyze renewable energy technologies in the design                  | Using BIM analysis tools to optimize energy design      |                                                     |
|                                             |     |                                     | The usage level of BIM computer modeling in the project design to reduce energy consumption. | Yes | Y                                                                          | Y                                      | Y                                                                                  | N                                                       |                                                     |
|                                             |     |                                     |                                                                                              |     | Identify equipment accessibility, standardization, modularization, ease of | Seek inputs from maintenance personnel | Integrate energy equipments maintenance and operation considerations in the design | Simulate annual loads and peak demands                  |                                                     |

|                                                        |                                                          |                                                                                                                                             |     |                                                                                         |                                                                        |                                                                                                                            |                                                       |  |
|--------------------------------------------------------|----------------------------------------------------------|---------------------------------------------------------------------------------------------------------------------------------------------|-----|-----------------------------------------------------------------------------------------|------------------------------------------------------------------------|----------------------------------------------------------------------------------------------------------------------------|-------------------------------------------------------|--|
|                                                        |                                                          |                                                                                                                                             |     | maintenance for the selected energy equipments and machines                             |                                                                        |                                                                                                                            |                                                       |  |
|                                                        |                                                          | The consideration level of operating and maintenance factors during the design                                                              | No  | N                                                                                       | N                                                                      | N                                                                                                                          | N                                                     |  |
|                                                        |                                                          |                                                                                                                                             |     | Identify innovative technologies and renewable power generation available in the market | Deciding on the most fitting energy-efficient equipment and techniques | Achieving design energy efficiency through reducing the demand for energy                                                  | Conduct an asset assessment to identify energy-saving |  |
|                                                        |                                                          | Design for net-zero energy (total amount of energy used yearly by a building is equal to or less than the amount of energy created on-site) | Yes | Y                                                                                       | Y                                                                      | N                                                                                                                          | N                                                     |  |
| At The End of The Design Phase                         |                                                          |                                                                                                                                             |     |                                                                                         |                                                                        |                                                                                                                            |                                                       |  |
| Participant 1                                          | PM-Consultant                                            |                                                                                                                                             |     |                                                                                         |                                                                        |                                                                                                                            |                                                       |  |
|                                                        | Did Your Commitment level Same as Beginning of The Phase |                                                                                                                                             |     |                                                                                         |                                                                        |                                                                                                                            |                                                       |  |
| What is Your Commitment at The End of The Design Phase | Waste Reduction                                          |                                                                                                                                             |     |                                                                                         | No                                                                     | If Yes Do not Complete Waste Reduction Table Otherwise Complete the Waste Reduction Tables According to What Has Been Done |                                                       |  |

|                                             |                                     |  |                                                                                                  |                                          |                                             |                                                                                                                                                         |                                    |                            |                                    |                                        |
|---------------------------------------------|-------------------------------------|--|--------------------------------------------------------------------------------------------------|------------------------------------------|---------------------------------------------|---------------------------------------------------------------------------------------------------------------------------------------------------------|------------------------------------|----------------------------|------------------------------------|----------------------------------------|
|                                             | Energy Consumption Reduction        |  |                                                                                                  |                                          | Yes                                         | If Yes Do not Complete Energy Consumption Reduction Table<br>Otherwise Complete the Energy Consumption Reduction Tables According to What Has Been Done |                                    |                            |                                    |                                        |
|                                             | Carbon Emissions Reduction          |  |                                                                                                  |                                          | No                                          | If Yes Do not Complete Carbon Emissions Reduction Table Otherwise Complete the Carbon Emissions Reduction Tables According to What Has Been Done        |                                    |                            |                                    |                                        |
| Are you Committed to the following Decision | If Select No Justify Your Selection |  |                                                                                                  | Commitment Indicator For Waste Reduction | Is This Indicator Applicable to The Project | Identify resource demand from project design                                                                                                            | Specify designed resource capacity | Specify the resource's gap | Close resource's gap               | Commitment Outcome for Waste Reduction |
| Waste Reduction                             | Yes                                 |  | Availability of resources.                                                                       | Yes                                      | Y                                           | Y                                                                                                                                                       | Y                                  | N                          | Low Waste Reduction Commitment 25% |                                        |
|                                             |                                     |  | The usage level of reuse and recycle construction and demolition materials in the project design | NA                                       | N                                           | N                                                                                                                                                       | N                                  | N                          |                                    |                                        |
|                                             |                                     |  | The usage level of BIM computer modeling in the project design to reduce waste.                  | NA                                       | N                                           | N                                                                                                                                                       | N                                  | N                          |                                    |                                        |
|                                             |                                     |  |                                                                                                  |                                          | Identify the design elements                | Defined the effectiveness of the architectural spaces                                                                                                   | Allow for adaptation of the space  | Conduct risk analysis      |                                    |                                        |

|  |  |                                                                                                                                                 |     |   |   |   |   |  |
|--|--|-------------------------------------------------------------------------------------------------------------------------------------------------|-----|---|---|---|---|--|
|  |  | Incorporate design flexibility factors (buildings that are designed with the flexibility to adapt to changing functions over long useful lives) | Yes | Y | Y | Y | Y |  |
|  |  | Involving green experts with waste management experience in the design team                                                                     | NA  | N | N | N | N |  |
